# Supplementary material
Source: PubMed Central journal article supplement (PMC3883972)
Supplement: NIHMS490049-supplement-1_si_001.pdf [file NIHMS490049-supplement-1_si_001.pdf]

# Disulfide crosslinked phosphorylcholine micelles for triggered release of camptothecin

Samantha McRae Page, Molly Martorella, Sangram Parelkar, Irem Kosif and Todd Emrick\*

Polymer Science & Engineering Department, 120 Governors Drive,  
University of Massachusetts, Amherst, Massachusetts, 01003

## Supporting Information

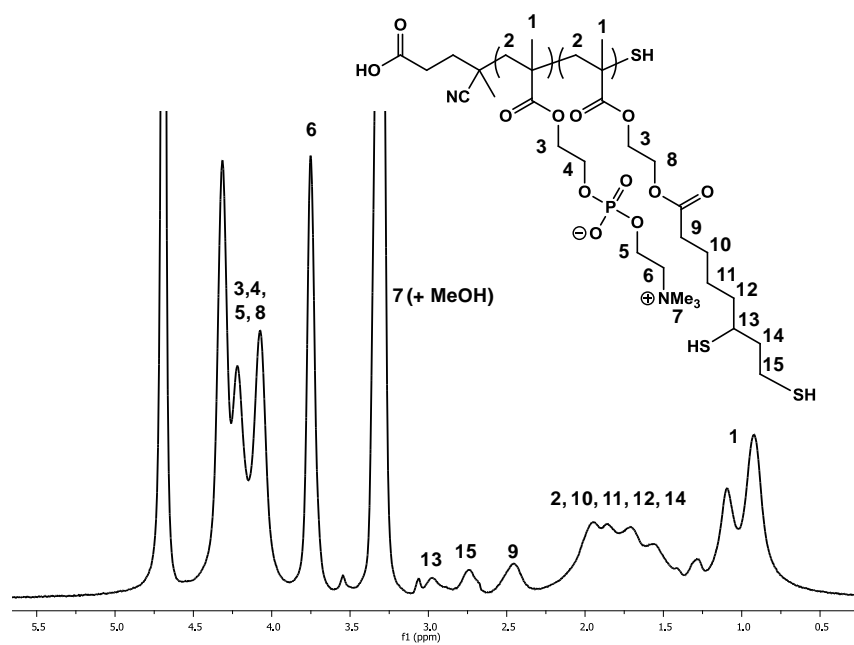

Figure S1. <sup>1</sup>H NMR spectrum (1:1 MeOD: CDCl<sub>3</sub>) of block copolymer 3.

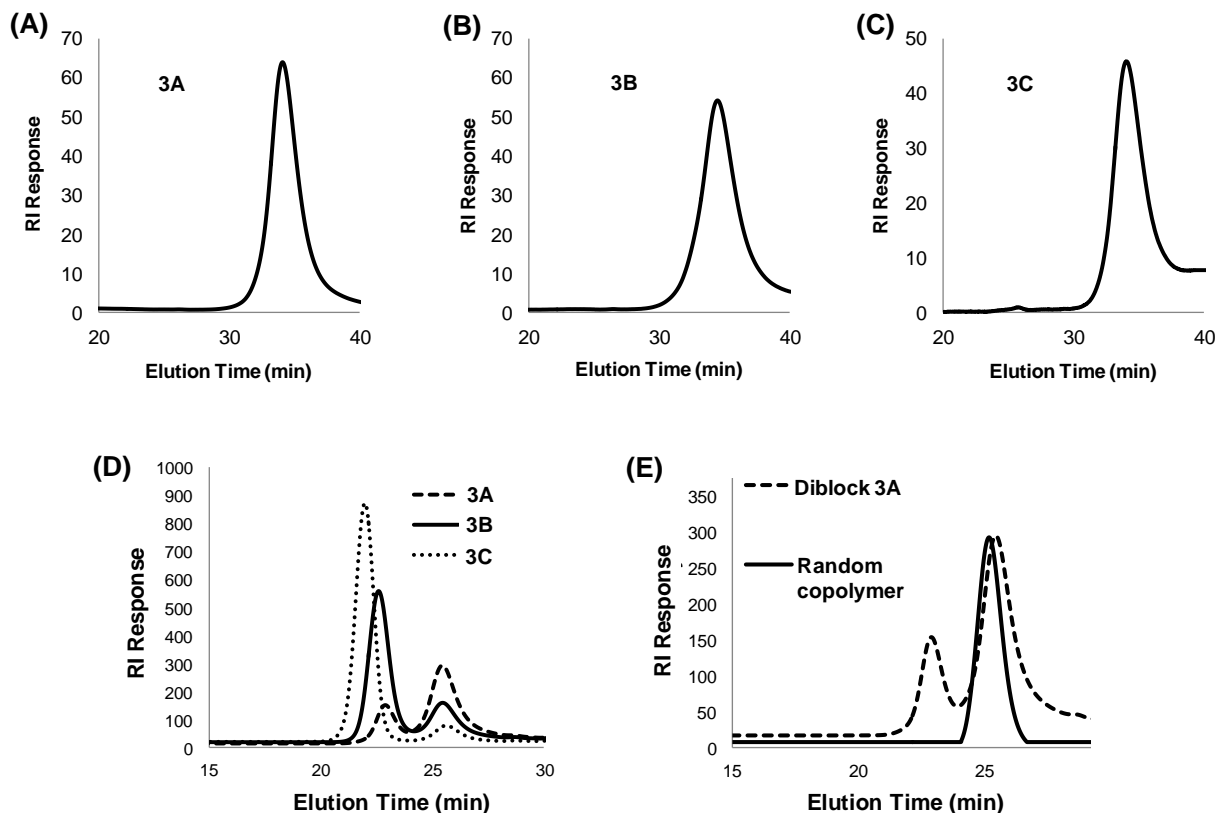

Figure S2. (A)-(C): GPC trace of copolymers 3A-C in TFE (0.2 M NaTFAc) (copolymers were treated with DTT prior to injection to minimize aggregation from disulfide formation); (D): GPC of block copolymers 3A-3C in water (0.1 M NaNO<sub>3</sub> + 0.01 % NaN<sub>3</sub>), showing increased aggregation with DHLA-block length; (E): GPC of block copolymer 3A compared with a random copolymer sample of comparable theoretical molecular weight and % DHLA (Mn 15,000 g/mole; 15% DHLA).

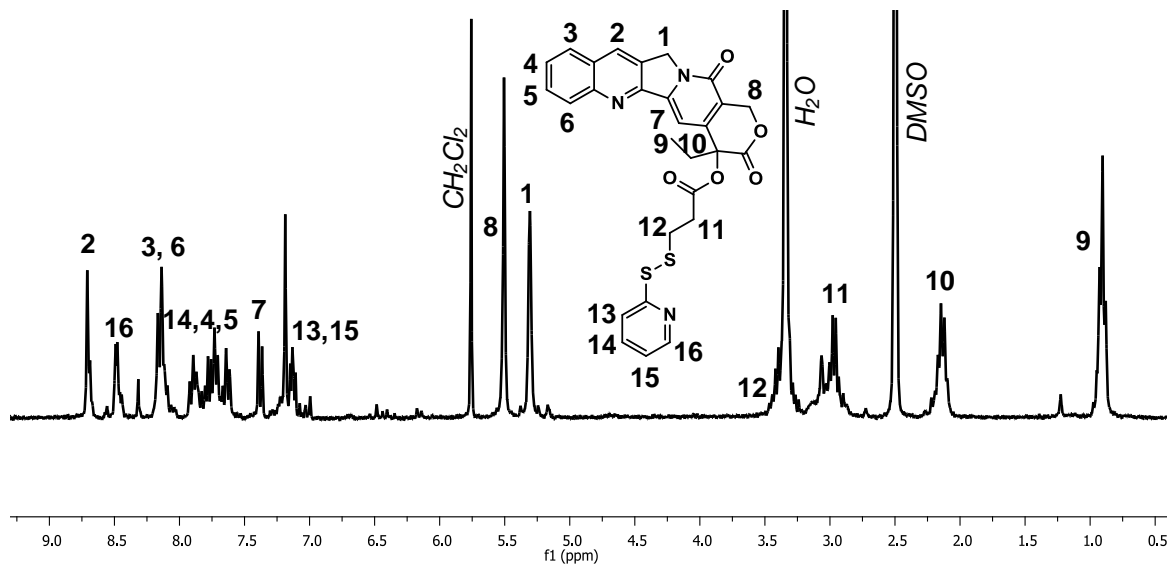

Figure S3.  $^1\text{H}$  NMR spectrum (DMSO- $d_6$ ) of CPT-pyridyl disulfide (6).

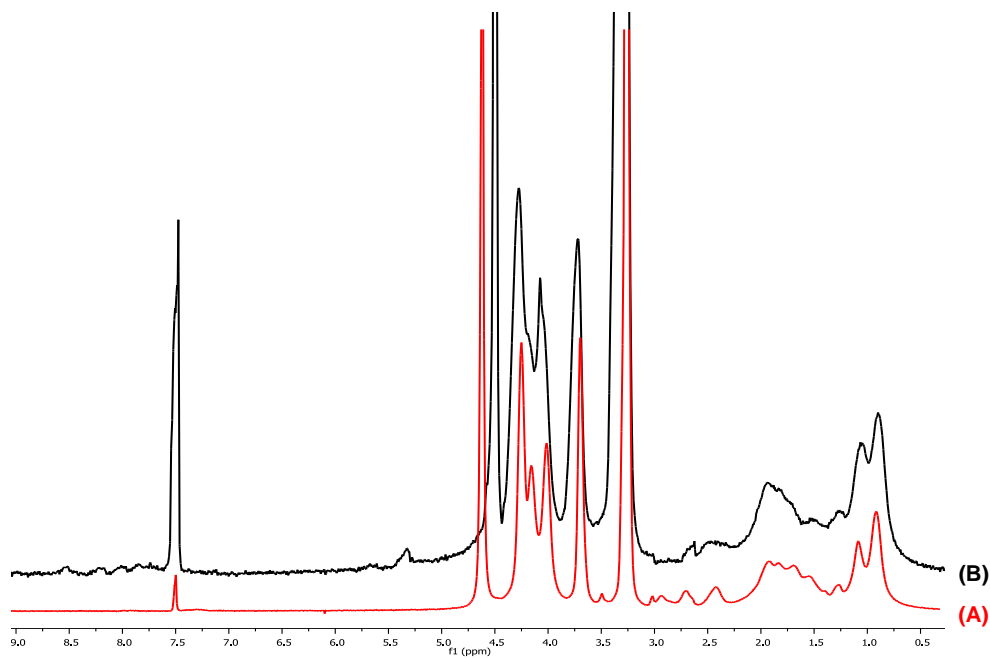

Figure S4.  $^1\text{H}$  NMR spectra of (A) uncross-linked polymer and (B) cross-linked polymer micelles loaded with CPT, showing the disappearance of the distinct DHLA resonances from 2.5 to 3.5 ppm, an overall broadening of peaks, and broad CPT signals from 8 to 9 ppm.

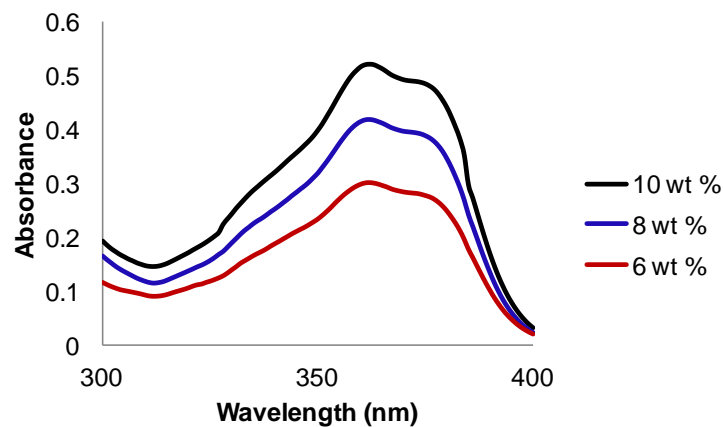

Figure S5. UV/Vis spectroscopy of CPT-loaded cross-linked polymer micelles at various weight percent camptothecin.

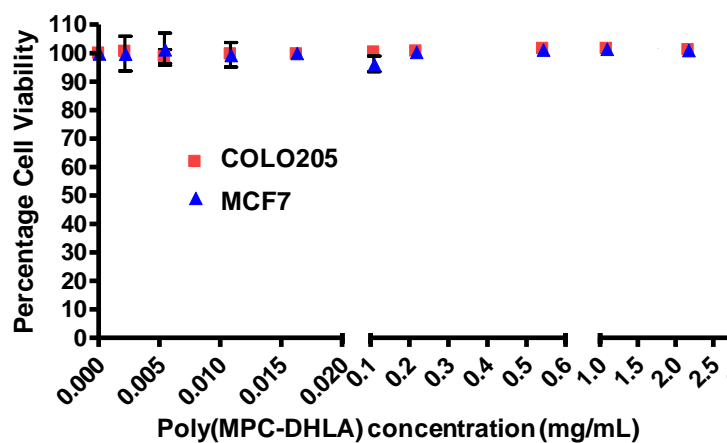

Figure S6. In vitro cytotoxicity of poly(MPC-DHLA) in cell culture of human breast (MCF7) and colorectal (COLO205) adenocarcinoma cells. The polymer is non-toxic at all concentrations tested. Error bars represent  $\pm$  standard deviation.
